# Supplementary material for: Combination Chemotherapy in Severe Pulmonary Vein Stenosis—A Case Series
Source: Children (Basel). 2023 Feb 11;10(2):364. doi: 10.3390/children10020364 (PMC9954861; doi:10.3390/children10020364)
Supplement: Supplementary file 1 [file children-10-00364-s001.zip › File S2. CCT De-identified data and graphs.xlsx]

## Sheet: Data
Patient 1						Patient 2						Patient 3
	Days Since First Catheterization	RUPV	LUPV	LLPV			Days Since First Catheterization	RUPV/RMPV	LU/Lingular PV	LLPV			Days Since First Catheterization	Common LPV	RU/RMPV
Pre	0	2.5		2.7		Pre	0	2.9	4.7	4.2			0	4	6.1
Post	0	2.5		2.7		Post	0	2.9	4.7	4.2		Pre	322	2.4	6.8
Pre	90	2.5	3.5	2.7		Pre	40	2		4.4		Post	322	5.4	6.8
Post	90	2.8	3.5	3.7		Post	40	3.1		4.4		Pre	432	2.8	6.1
Pre	132	1.1	2.4	2.7		Pre	75	2.1	3.5	4.9		Post	432	5	6.1
Post	132	3.1	3.6	3		Post	75	3.2	3.9	4.9		Pre	526	3.4	6.1
Pre	179	1.1	0.7	2.2		Pre	117	2	1.7	4.5		Post	526	8	6.1
Post	179	2	2.4	3.7		Post	117	4.2	4	4.5		Pre	645	0	6.1
Pre	223	2	1.8	2.4		Pre	182	1.5	1.4	4.3		Post	645	4.7	6.1
Post	223	3	3	2.4		Post	182	2.6	2.5	4.3		Pre	679	4.7	5.6
Pre	265	2.6	3	2.9		Pre	287	1.3	2.6	1.4		Post	679	4.7	5.6
Post	265	4.1	4.2	3		Post	287	2	4	2.1		Pre	1225	0.1	3.5
Pre	326	2.6	1.6	3.1		Pre	322	2	2.9	2.7		Post	1225	4.6	7
Post	326	3.3	3.1	3.1		Post	322	3	5.2	4.8		Pre	1267	4.6	7
Pre	412	2.6	2.6	3		Pre	357	2.4	5.3	5		Post	1267	4.6	7
Post	412	3.2	3.6	3		Post	357	2.8	6	5		Pre	1372	4.6	6.3
Pre	524	2.5	1.6	3		Pre	483	2.8	5.4	4.9		Post	1372	4.6	6.3
Post	524	3.1	3.4	3		Post	483	4.8	6	4.9
												Stenting	526
						Surgery	222					Surgery	527
Surgery with hybrid stenting	181					Gleevec Start	289					DES Insertion	645
Gleevec Start	201					Sirolimus Start	323					Gleevec Start	1226
Sirolimus Start	223											Sirolimus Start	1226
